# Supplementary material for: Novel role of mortalin in attenuating HIV-1 Tat-mediated astrogliosis
Source: PubMed Central journal article supplement (PMC7504834; doi:10.1186/s12974-020-01912-3), 2020-09-20
Supplement: 12974_2020_1912_MOESM1_ESM.pdf [file 12974_2020_1912_MOESM1_ESM.pdf]

**FigS.1**

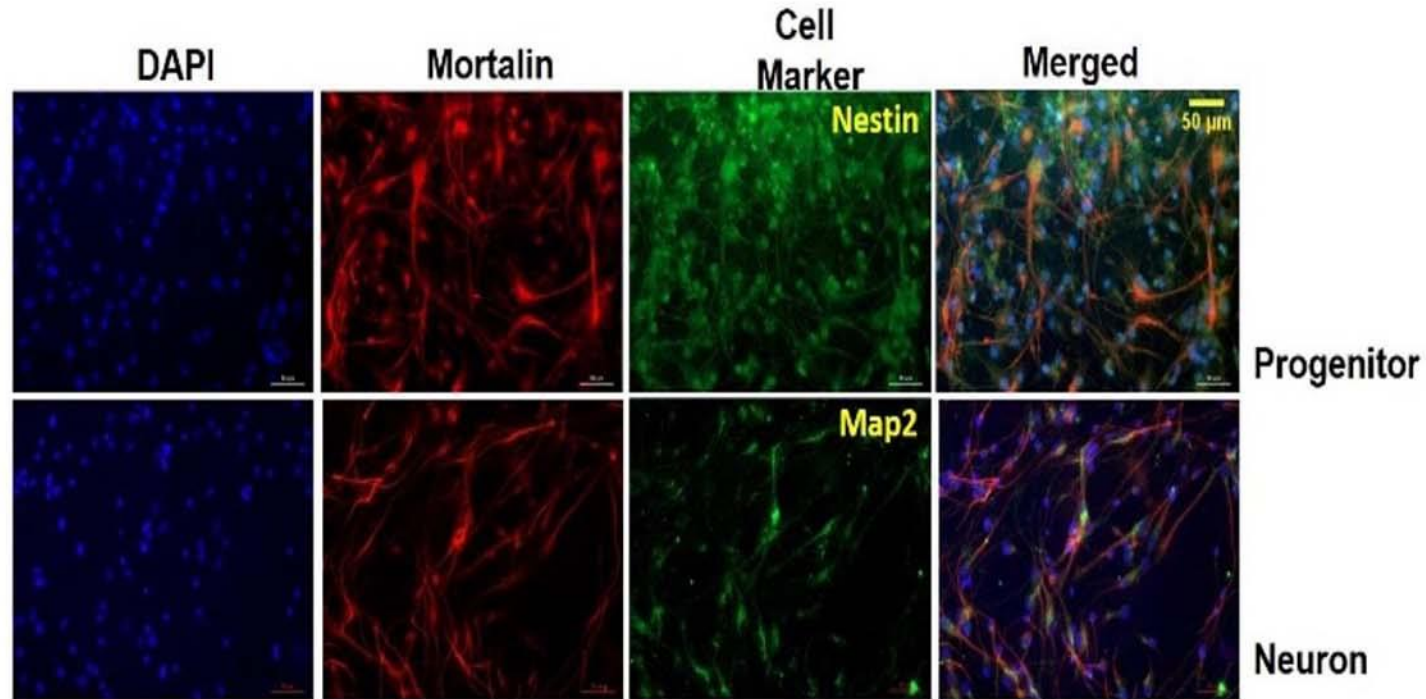

**FigS.1) Expression of mortalin in human fetal brain derived cells.** Representative immunocytochemistry images of human progenitor cells (upper panel) were stained with anti-mortalin in red and anti-nestin in green and merged depicting co-localization of mortalin and nestin. Scale bar, 50μm (n=3). Human neuronal cells differentiated from human fetal brain derived progenitor were stained with anti-mortalin in red and anti-Map2 in green and merged depicting the co-localization of both these protein. Scale bar 50μm (n=3)

**FigS.2**

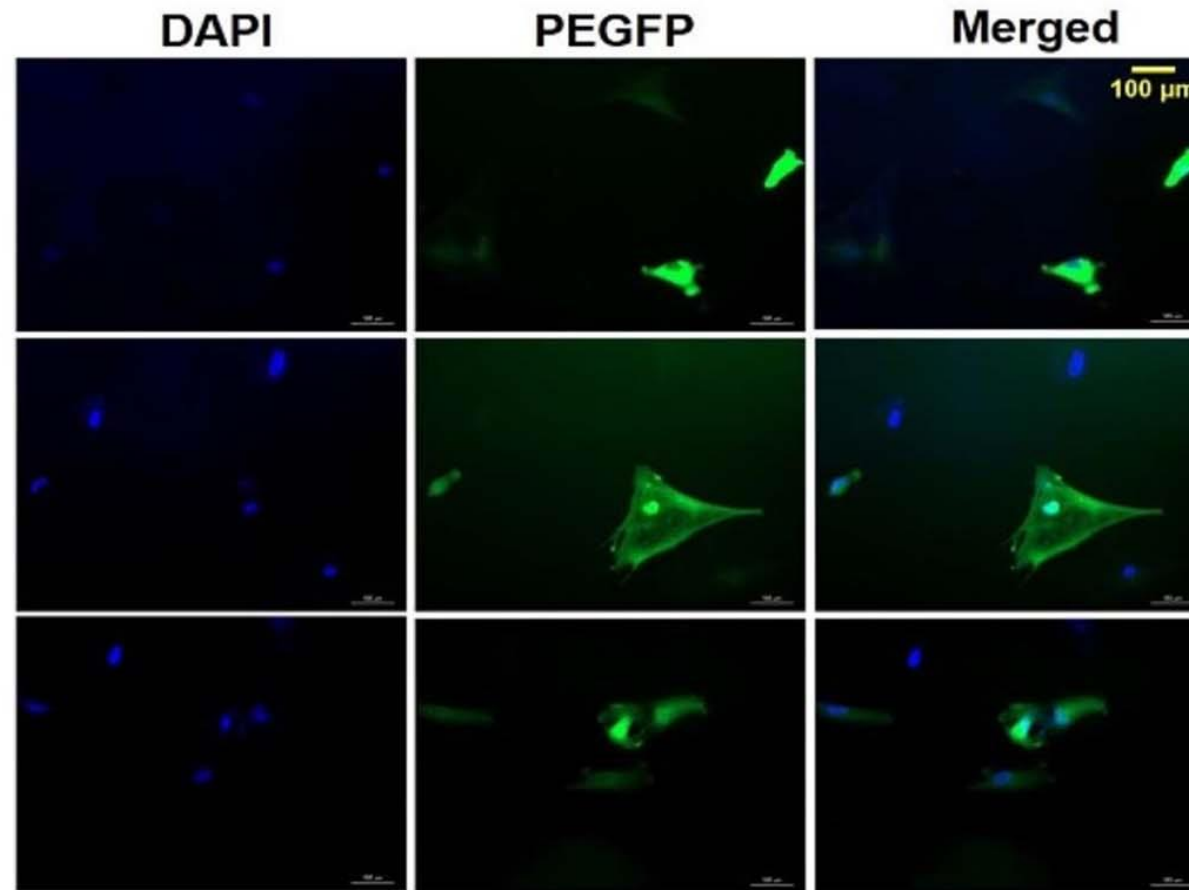

**FigS.2) Transfection efficiency of plasmid in progenitor derived astrocytes.** PDA transfected with PEGFP plasmid for 24h, depicting 20-25% of transfection efficiency in progenitor derived astrocytes.

FigS.3

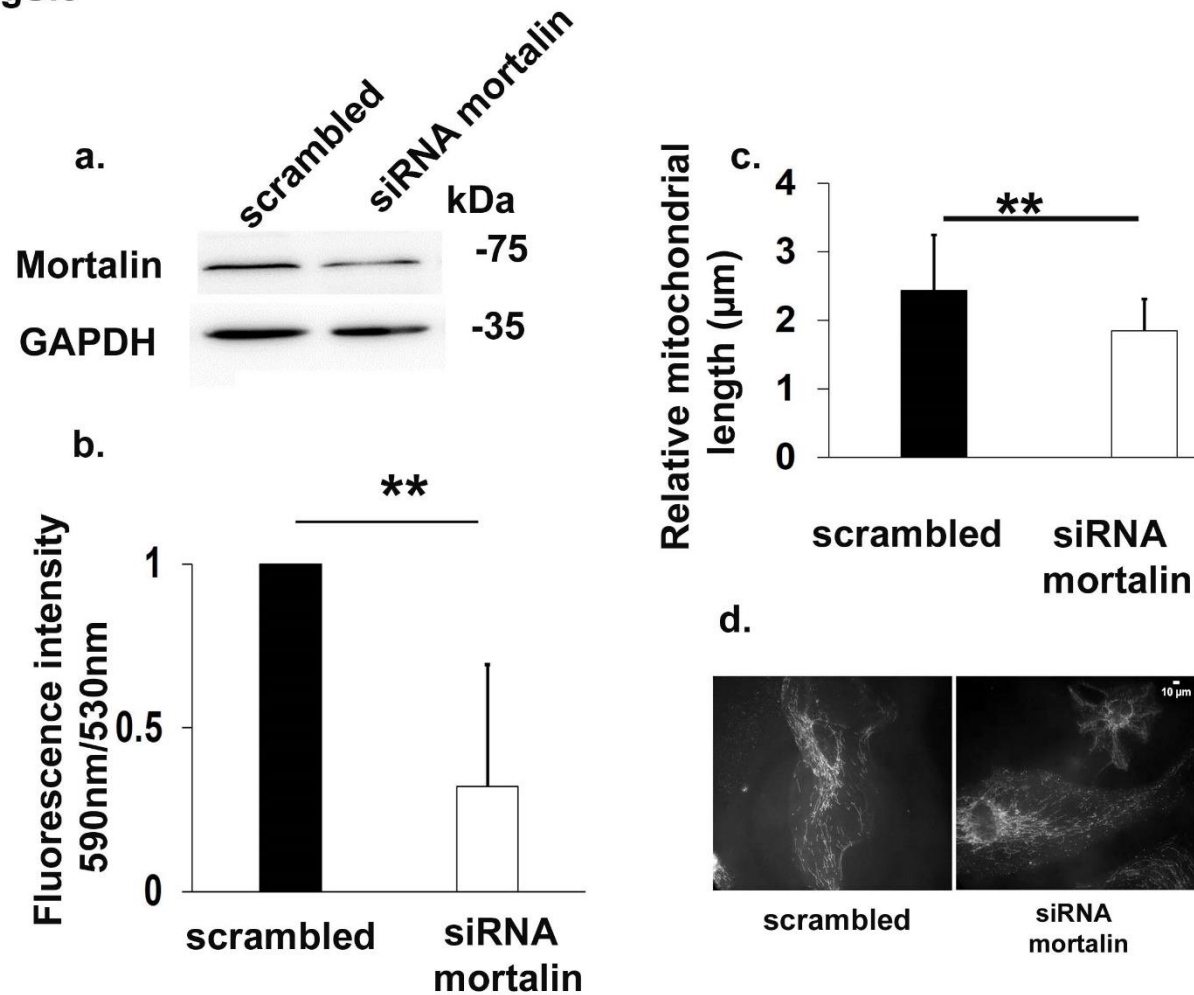

**FigS.3) Knockdown of mortalin in PDA damages the mitochondrial health.** a) western blot represents the knockdown of mortalin in PDA b) Fold change in mitochondrial membrane potential (mean fluorescence intensity of JC-1 aggregates/JC-1 monomers) in indicated transfected groups after 24h, as analyzed by fluorescence estimation (n=3). c) Quantitative analysis of mitochondrial length stained with mitotrackerRED (n=3). d) Representative images of PDA post 24h of transfection, stained with mitotrackerRED, Scale bar 10µm (n=3). All data represent mean ± standard deviation, from independent experiments (n stands for number of independent experiment, \*\*p<0.005 with respect to control).

**FigS.4**

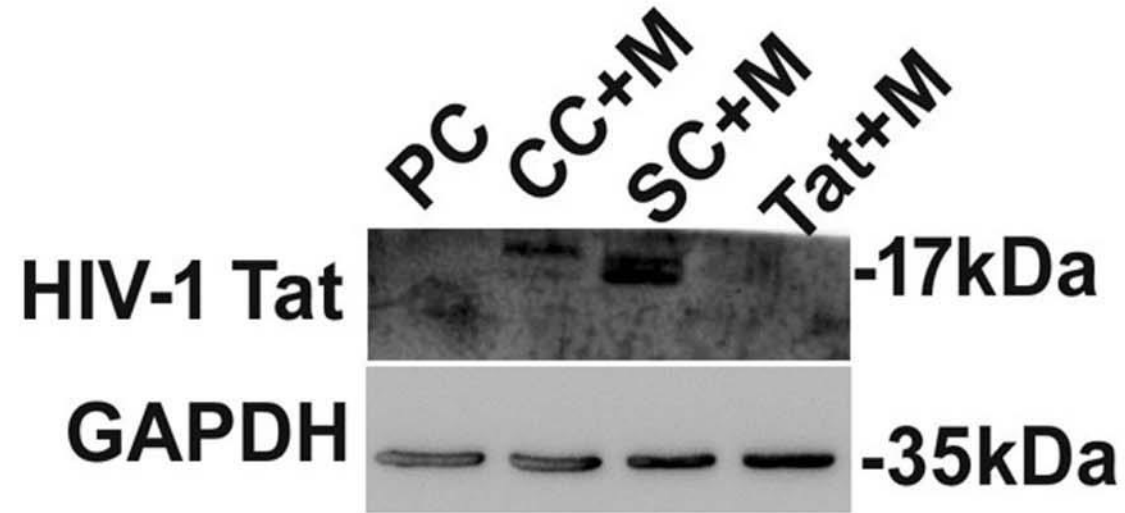

**FigS.4) Expression of mutant Tat.** Representative western blot shows the expression of HIV-1 Tat in cotransfected PDA. Abbreviations are as follows: CC (cysteine-cysteine) and SC (serine-cysteine) are the isogenic mutant of wild type Tat-C, M-Mortalin and Tat- HIV-1 Tat.

**FigS.5**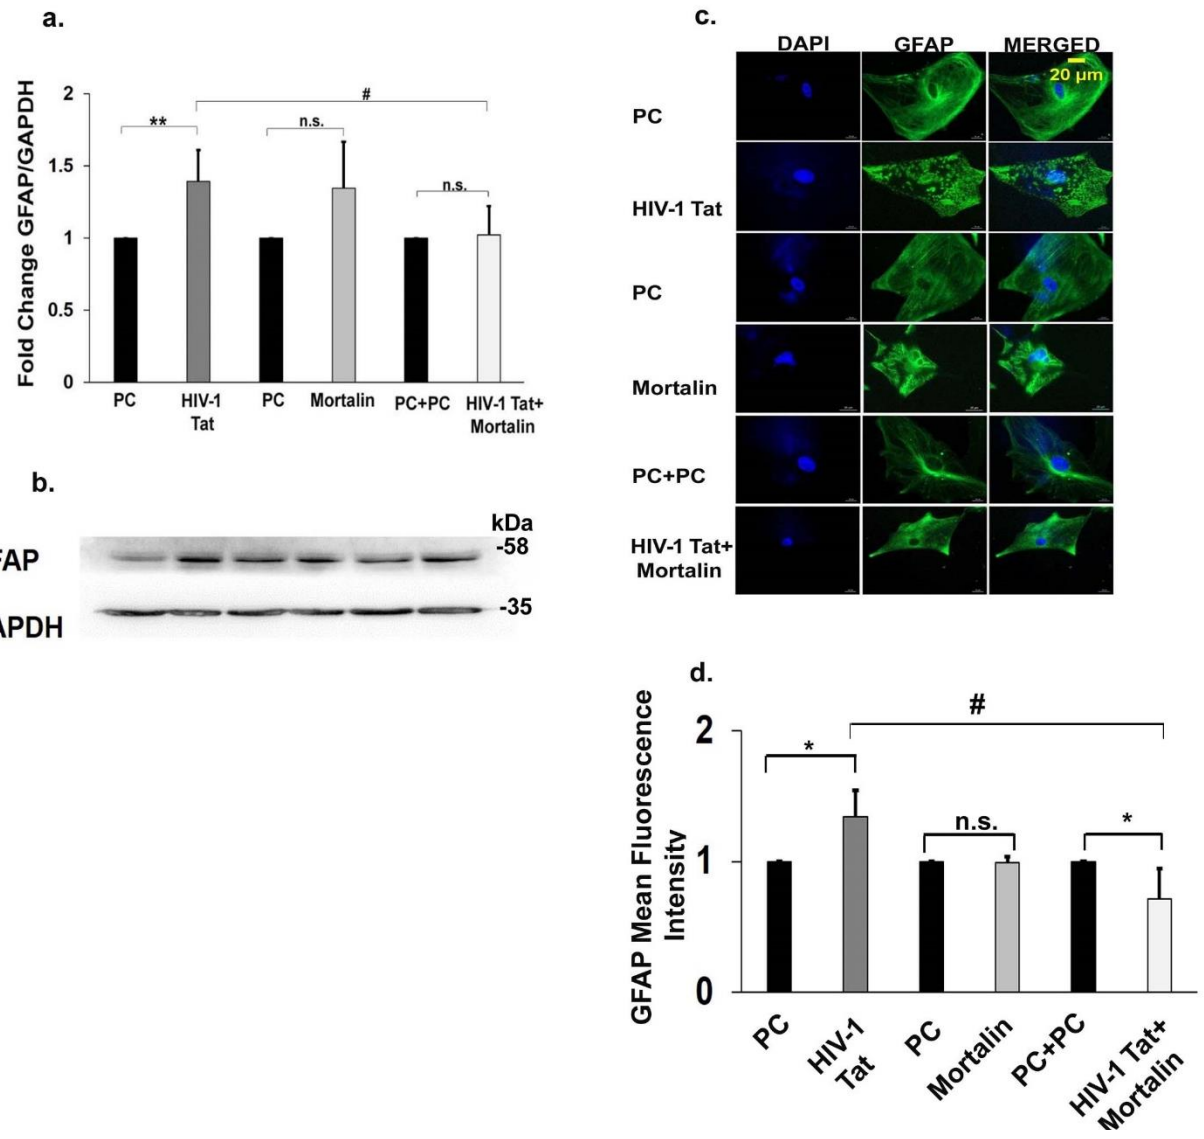

**FigS.5) GFAP Expression and Aggregation in progenitor derived astrocytes.** a) Fold change in the expression of GFAP in transfected astrocytes (n=4). b) Representative western blot showing change in GFAP at protein level (n=4). c) Immunocytochemistry of GFAP in green counterstained with DAPI, showing aggregates of intermediate filaments. Scale bar, 20 $\mu$ m. d) Fold change in the mean fluorescence intensity of GFAP (n=3). All data represent mean  $\pm$  standard deviation, from independent experiments (n stands for number of independent experiment, \*p<0.05, \*\*p<0.005 with respect to control, #p<0.05, ##p<0.005 with respect to HIV-1 Tat and Cotransfected group. (PC stands for Plasmid control)

**FigS.6**

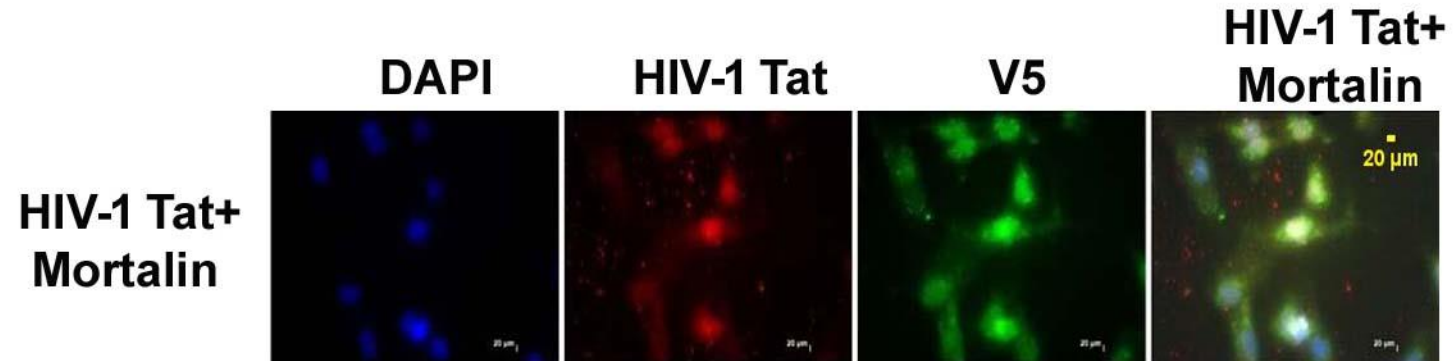

**FigS.6. Expression of HIV-1 Tat in cotransfected PDA.**

Representative immunofluorescence image of cotransfected PDA showed the expression of Tat and exogenous mortalin tagged with V5 after 24h of transfection. Scale bar 20μm. (n=3)
